# Supplementary material for: Mapping the stability of febrile illness hotspots in Punjab from 2012 to 2019- a spatial clustering and regression analysis
Source: Springer Nature journal article supplement (doi:10.1186/s12889-023-16930-y), 2023-10-16
Supplement: MOESM1 [file 26186736]

**Dengue(2012-2019)**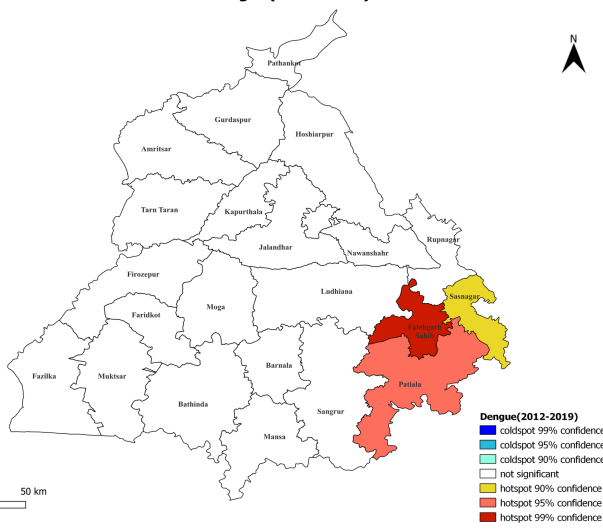**S1a: Dengue****Chikungunya(2012-2019)**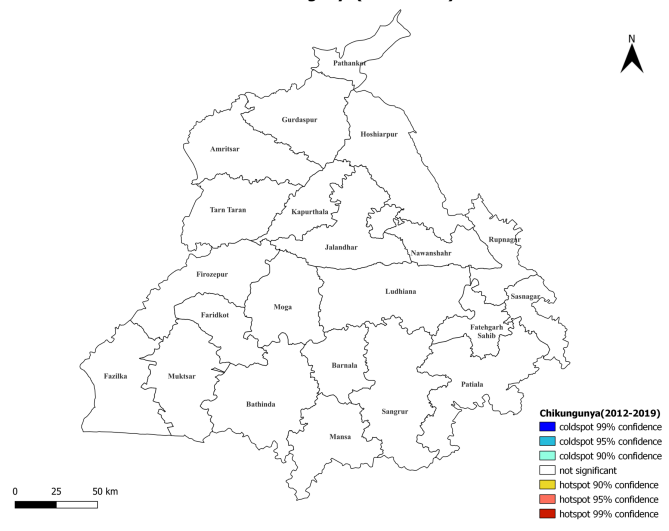**S1b: Chikungunya****Malaria (P. Falciparum)(2012-2019)**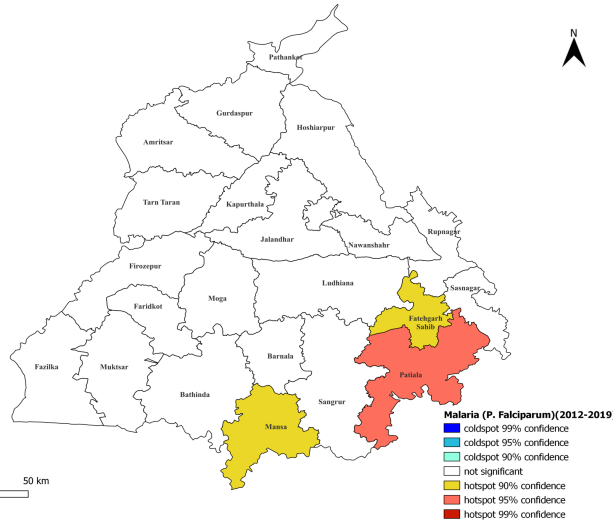**S1c: Malaria (P. Falciparum)****Malaria (P. Vivax)(2012-2019)**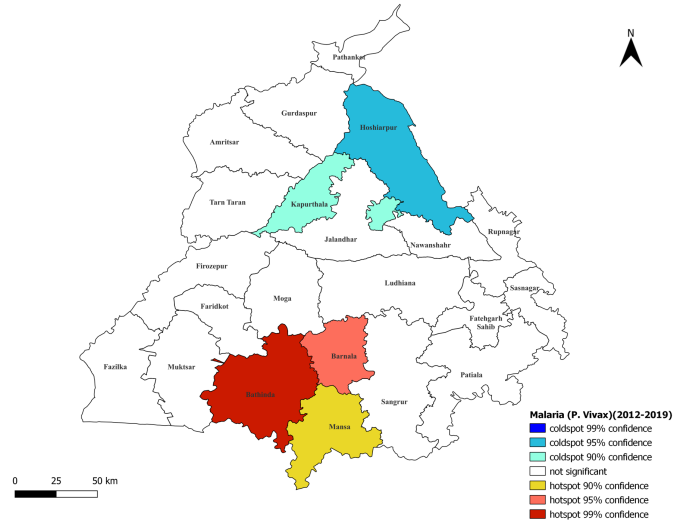**S1d: Malaria (P. Vivax)****Enteric Fever(2012-2019)**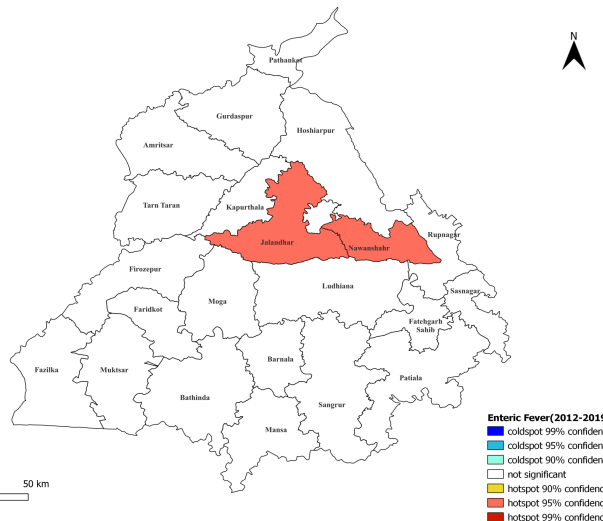**S1 e: Enteric Fever****Pyrexia of Unknown Origin(2012-2019)**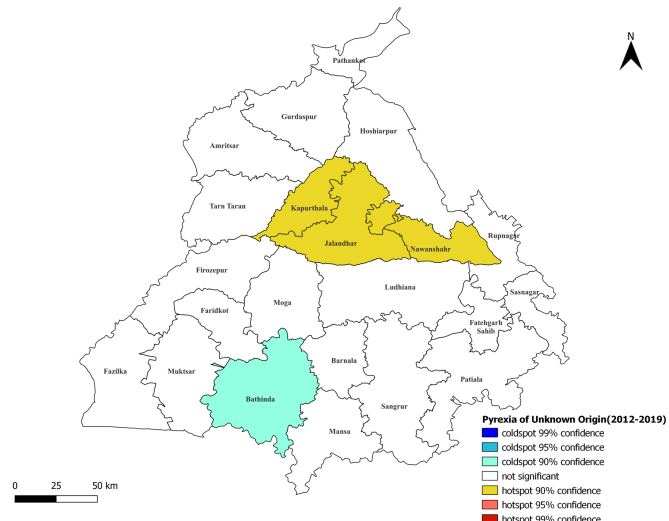**S1 f: Pyrexia of Unknown Origin**

**Supplementary Material S1 (a-f): Getis-ord  $G_i^*$  maps depicting the caseload hotspots of different febrile illnesses reported through IDSP in the state of Punjab (India) between 2012-19**
