# Supplementary material for: Mapping the stability of febrile illness hotspots in Punjab from 2012 to 2019- a spatial clustering and regression analysis
Source: Springer Nature journal article supplement (doi:10.1186/s12889-023-16930-y), 2023-10-16
Supplement: MOESM3 [file 26186736]

**Supplementary material 3: Spatial auto-correlation of the febrile illnesses reported under IDSP Punjab between 2012-2019 using Global Moran's I.**

| Year        | Dengue    |         | Chikungunya |         | Malaria<br>( <i>P. Falciparum</i> ) |         | Malaria<br>( <i>P. Vivax</i> ) |         | Enteric fever |         | Pyrexia of Unknown Origin |         |
|-------------|-----------|---------|-------------|---------|-------------------------------------|---------|--------------------------------|---------|---------------|---------|---------------------------|---------|
|             | Moran's I | p-value | Moran's I   | p-value | Moran's I                           | p-value | Moran's I                      | p-value | Moran's I     | p-value | Moran's I                 | p-value |
| <b>2012</b> | -0.139    | 0.069   | -           | -       | -0.054                              | 0.448   | 0.037                          | 0.25    | -0.004        | 0.346   | -0.031                    | 0.417   |
| <b>2013</b> | -0.161    | 0.019   | -           | -       | -0.044                              | 0.46    | 0.037                          | 0.231   | 0.032         | 0.161   | -0.043                    | 0.449   |
| <b>2014</b> | -0.095    | 0.255   | -0.050      | 0.495   | -0.073                              | 0.441   | 0.210                          | 0.031   | 0.033         | 0.191   | -0.021                    | 0.366   |
| <b>2015</b> | -0.125    | 0.277   | -           | -       | 0.225                               | 0.016   | -0.059                         | 0.487   | -0.011        | 0.318   | 0.054                     | 0.213   |
| <b>2016</b> | 0.169     | 0.04    | -0.136      | 0.265   | -                                   | -       | -0.095                         | 0.395   | 0.018         | 0.19    | 0.094                     | 0.136   |
| <b>2017</b> | 0.055     | 0.18    | 0.022       | 0.051   | -0.013                              | 0.323   | -0.099                         | 0.361   | 0.045         | 0.19    | 0.025                     | 0.291   |
| <b>2018</b> | 0.093     | 0.099   | 0.022       | 0.258   | 0.366                               | 0.006   | -0.006                         | 0.325   | -0.037        | 0.414   | -0.095                    | 0.408   |
| <b>2019</b> | -0.130    | 0.252   | -0.052      | 0.456   | -0.047                              | 0.474   | 0.043                          | 0.198   | -0.014        | 0.29    | -0.045                    | 0.422   |
