# Supplementary material for: Mapping the stability of febrile illness hotspots in Punjab from 2012 to 2019- a spatial clustering and regression analysis
Source: Springer Nature journal article supplement (doi:10.1186/s12889-023-16930-y), 2023-10-16
Supplement: MOESM4 [file 26186736]

Supplementary material 4

Supplementary material 4a: District-wise trends of Local Moran's I value to depict the stability of the hotspots for the Dengue cases reported under IDSP in Punjab between 2012-19

| District        | 2012      |         |                | 2013      |         |                | 2014      |         |                | 2015      |         |                | 2016      |         |                | 2017      |         |                | 2018      |         |                | 2019      |         |                |
|-----------------|-----------|---------|----------------|-----------|---------|----------------|-----------|---------|----------------|-----------|---------|----------------|-----------|---------|----------------|-----------|---------|----------------|-----------|---------|----------------|-----------|---------|----------------|
|                 | Moran's I | p-value | Classification | Moran's I | p-value | Classification | Moran's I | p-value | Classification | Moran's I | p-value | Classification | Moran's I | p-value | Classification | Moran's I | p-value | Classification | Moran's I | p-value | Classification | Moran's I | p-value | Classification |
| Amritsar        | 0.0316    | 0.271   | NS             | 0.0098    | 0.357   | NS             | -0.05     | 0.48    | NS             | 0.2022    | 0.047   | L-L            | 0.43      | 0.056   | NS             | 0.3572    | 0.227   | NS             | 0.3548    | 0.066   | NS             | -0.3727   | 0.281   | NS             |
| Barnala         | -0.043    | 0.344   | NS             | -0.0903   | 0.258   | NS             | -0.2      | 0.238   | NS             | -0.5613   | 0.06    | NS             | -0.01     | 0.364   | NS             | -0.0097   | 0.484   | NS             | -0.0591   | 0.305   | NS             | -0.0354   | 0.253   | NS             |
| Bathinda        | 0.0924    | 0.166   | NS             | -0.0052   | 0.381   | NS             | 0.074     | 0.129   | NS             | -0.2572   | 0.457   | NS             | 0.08      | 0.368   | NS             | 0.0555    | 0.329   | NS             | -0.0327   | 0.279   | NS             | -0.0771   | 0.153   | NS             |
| Faridkot        | 0.0777    | 0.434   | NS             | 0.0731    | 0.307   | NS             | 0.065     | 0.213   | NS             | 0.0094    | 0.3     | NS             | -0.1      | 0.399   | NS             | -0.0901   | 0.317   | NS             | -0.0268   | 0.414   | NS             | 0.0385    | 0.499   | NS             |
| Fatehgarh Sahib | -0.3475   | 0.052   | NS             | -0.2668   | 0.033   | L-H            | -0.31     | 0.124   | NS             | -0.1786   | 0.051   | NS             | -0.66     | 0.002   | L-H            | -0.9603   | 0.01    | L-H            | -0.6431   | 0.016   | L-H            | -0.0954   | 0.288   | NS             |
| Fazilka         | 0.1013    | 0.405   | NS             | 0.1962    | 0.227   | NS             | 0.243     | 0.303   | NS             | 0.1068    | 0.478   | NS             | 0.03      | 0.392   | NS             | -0.0018   | 0.421   | NS             | -0.0787   | 0.299   | NS             | -0.8933   | 0.472   | NS             |
| Ferozepur       | 0.0577    | 0.182   | NS             | 0.1635    | 0.092   | NS             | 0.096     | 0.31    | NS             | -0.2304   | 0.071   | NS             | -0.22     | 0.197   | NS             | -0.0872   | 0.304   | NS             | 0.0328    | 0.352   | NS             | 0.0241    | 0.334   | NS             |
| Gurdaspur       | 0.0385    | 0.355   | NS             | 0.0021    | 0.354   | NS             | -0.11     | 0.217   | NS             | 0.3506    | 0.128   | NS             | 0.3       | 0.127   | NS             | 0.3293    | 0.164   | NS             | 0.3756    | 0.015   | L-L            | 0.1053    | 0.416   | NS             |
| Hoshiarpur      | -0.117    | 0.146   | NS             | -0.0144   | 0.255   | NS             | -0.36     | 0.45    | NS             | 0.134     | 0.066   | NS             | 0.12      | 0.075   | NS             | 0.2632    | 0.166   | NS             | 0.2521    | 0.109   | NS             | 0.257     | 0.218   | NS             |
| Jalandhar       | -0.0491   | 0.287   | NS             | -0.0226   | 0.348   | NS             | 0.463     | 0.042   | H-H            | 0.0096    | 0.438   | NS             | 0.05      | 0.299   | NS             | 0.0999    | 0.228   | NS             | 0.1637    | 0.054   | NS             | -0.0396   | 0.433   | NS             |
| Kapurthala      | 0.0555    | 0.457   | NS             | -0.018    | 0.313   | NS             | 0.015     | 0.303   | NS             | 0.1223    | 0.198   | NS             | 0.12      | 0.103   | NS             | -0.2638   | 0.035   | H-L            | 0.1544    | 0.001   | L-L            | -0.0808   | 0.329   | NS             |
| Ludhiana        | -0.6726   | 0.063   | NS             | -0.7647   | 0.005   | H-L            | -1.3      | 0.173   | NS             | 0.0007    | 0.452   | NS             | 0.01      | 0.459   | NS             | 0.1226    | 0.147   | NS             | 0.0538    | 0.415   | NS             | 0.0061    | 0.349   | NS             |
| Mansa           | 0.1246    | 0.294   | NS             | -0.0396   | 0.341   | NS             | 0.202     | 0.214   | NS             | 0.6806    | 0.096   | NS             | -0.06     | 0.245   | NS             | 0.074     | 0.327   | NS             | 0.2345    | 0.214   | NS             | -0.4442   | 0.17    | NS             |
| Moga            | -0.0309   | 0.348   | NS             | -0.0066   | 0.42    | NS             | -0.26     | 0.119   | NS             | -0.0547   | 0.308   | NS             | 0.01      | 0.471   | NS             | 0.1127    | 0.335   | NS             | 0.0616    | 0.34    | NS             | -0.0132   | 0.394   | NS             |
| Muktsar         | 0.1007    | 0.488   | NS             | 0.0858    | 0.307   | NS             | 0.142     | 0.28    | NS             | -0.2276   | 0.281   | NS             | 0.02      | 0.471   | NS             | -0.1106   | 0.318   | NS             | -0.0274   | 0.407   | NS             | -0.5524   | 0.087   | NS             |
| Pathankot       | 0.0051    | 0.191   | NS             | -0.007    | 0.234   | NS             | -0.49     | 0.125   | NS             | 0.3974    | 0.208   | NS             | 0.27      | 0.311   | NS             | 0.3357    | 0.062   | NS             | 0.44      | 0.014   | L-L            | 0.8088    | 0.035   | L-L            |
| Patiala         | -0.3879   | 0.099   | NS             | -1.1762   | 0.422   | NS             | -0.31     | 0.182   | NS             | 0.9048    | 0.142   | NS             | 3.24      | 0.009   | H-H            | 2.2743    | 0.014   | H-H            | 0.5595    | 0.139   | NS             | -0.0527   | 0.235   | NS             |
| Rupnagar        | -0.4003   | 0.009   | L-H            | -0.0833   | 0.305   | NS             | -0.41     | 0.038   | L-H            | 0.1603    | 0.293   | NS             | -0        | 0.497   | NS             | 0.037     | 0.439   | NS             | -0.1947   | 0.057   | NS             | 0.08      | 0.378   | NS             |
| SAS Nagar       | -1.4378   | 0.001   | H-L            | -0.133    | 0.096   | NS             | 0.045     | 0.456   | NS             | -0.4476   | 0.115   | NS             | 1.23      | 0.103   | NS             | 1.1177    | 0.129   | NS             | -0.0688   | 0.055   | NS             | 0.0461    | 0.272   | NS             |
| Sangrur         | -0.0326   | 0.406   | NS             | -0.47     | 0.017   | L-H            | -0.29     | 0.135   | NS             | 1.0364    | 0.051   | NS             | 0.75      | 0.104   | NS             | 0.3985    | 0.178   | NS             | 0.7373    | 0.071   | NS             | -0.4962   | 0.336   | NS             |
| Nawanshahr      | -0.0981   | 0.252   | NS             | -0.0906   | 0.285   | NS             | -0.64     | 0.005   | L-H            | -0.0112   | 0.219   | NS             | 0.21      | 0.246   | NS             | 0.1159    | 0.245   | NS             | 0.1606    | 0.201   | NS             | -0.2154   | 0.28    | NS             |
| Tarn Taran      | 0.0698    | 0.373   | NS             | 0.0812    | 0.431   | NS             | 0.029     | 0.393   | NS             | 0.0779    | 0.463   | NS             | 0.11      | 0.483   | NS             | -0.0154   | 0.445   | NS             | 0.2736    | 0.242   | NS             | -0.4955   | 0.198   | NS             |

\*NS: Non-significant; L-L: Low-Low; L-H: low-High; H-L: High Low; H-H: High-High

**Supplementary material 4b: District wise trends of Local Moran's I value to depict the stability of the hotspots for the Chikungunya cases reported under IDSP in Punjab between 2012-19**

|                        | 2012      |         |                | 2013      |         |                | 2014      |         |                | 2015      |         |                | 2016      |         |                | 2017      |         |                | 2018      |         |                | 2019      |         |                |
|------------------------|-----------|---------|----------------|-----------|---------|----------------|-----------|---------|----------------|-----------|---------|----------------|-----------|---------|----------------|-----------|---------|----------------|-----------|---------|----------------|-----------|---------|----------------|
|                        | Moran's I | p-value | Classification | Moran's I | p-value | Classification | Moran's I | p-value | Classification | Moran's I | p-value | Classification | Moran's I | p-value | Classification | Moran's I | p-value | Classification | Moran's I | p-value | Classification | Moran's I | p-value | Classification |
| <b>Amritsar</b>        |           | 0.001   | L-L            |           | 0.001   | L-L            | 0.0455    | 0.14    | NS             |           | 0.001   | L-L            | 0.3306    | 0.071   | NS             | 0.0729    | 0.324   | NS             | 0.2008    | 0.401   | NS             | -0.1266   | 0.158   | NS             |
| <b>Barnala</b>         |           | 0.001   | L-L            |           | 0.001   | L-L            | 0.0455    | 0.234   | NS             |           | 0.001   | L-L            | -0.0972   | 0.37    | NS             | 0.0148    | 0.369   | NS             | 0.1365    | 0.291   | NS             | 0.1612    | 0.298   | NS             |
| <b>Bathinda</b>        |           | 0.001   | L-L            |           | 0.001   | L-L            | 0.0455    | 0.234   | NS             |           | 0.001   | L-L            | -1.1123   | 0.161   | NS             | 0.0686    | 0.36    | NS             | 0.0583    | 0.311   | NS             | 0.1612    | 0.298   | NS             |
| <b>Faridkot</b>        |           | 0.001   | L-L            |           | 0.001   | L-L            | 0.0455    | 0.195   | NS             |           | 0.001   | L-L            | -0.2704   | 0.097   | NS             | 0.0513    | 0.283   | NS             | 0.3876    | 0.261   | NS             | 0.1612    | 0.001   | L-L            |
| <b>Fatehgarh Sahib</b> |           | 0.001   | L-L            |           | 0.001   | L-L            | -0.1545   | 0.001   | L-H            |           | 0.001   | L-L            | -0.2374   | 0.18    | NS             | -0.2352   | 0.047   | L-H            | 0.111     | 0.375   | NS             | 0.0197    | 0.5     | NS             |
| <b>Fazilka</b>         |           | 0.001   | L-L            |           | 0.001   | L-L            | 0.0455    | 0.095   | NS             |           | 0.001   | L-L            | -0.1681   | 0.246   | NS             | 0.0729    | 0.48    | NS             | -0.1609   | 0.211   | NS             | 0.1612    | 0.001   | L-L            |
| <b>Ferozepur</b>       |           | 0.001   | L-L            |           | 0.001   | L-L            | 0.0455    | 0.337   | NS             |           | 0.001   | L-L            | -0.3633   | 0.272   | NS             | 0.0694    | 0.226   | NS             | 0.0308    | 0.491   | NS             | -0.1913   | 0.111   | NS             |
| <b>Gurdaspur</b>       |           | 0.001   | L-L            |           | 0.001   | L-L            | 0.0455    | 0.195   | NS             |           | 0.001   | L-L            | 0.1852    | 0.291   | NS             | 0.0658    | 0.442   | NS             | 0.2008    | 0.295   | NS             | -0.1474   | 0.19    | NS             |
| <b>Hoshiarpur</b>      |           | 0.001   | L-L            |           | 0.001   | L-L            | -0.1212   | 0.054   | NS             |           | 0.001   | L-L            | -0.0972   | 0.28    | NS             | 0.043     | 0.336   | NS             | -0.1133   | 0.281   | NS             | -0.4298   | 0.001   | L-H            |
| <b>Jalandhar</b>       |           | 0.001   | L-L            |           | 0.001   | L-L            | 0.0455    | 0.287   | NS             |           | 0.001   | L-L            | -0.0891   | 0.473   | NS             | 0.0637    | 0.432   | NS             | -0.159    | 0.19    | NS             | -0.1549   | 0.27    | NS             |
| <b>Kapurthala</b>      |           | 0.001   | L-L            |           | 0.001   | L-L            | 0.0455    | 0.337   | NS             |           | 0.001   | L-L            | -0.0094   | 0.482   | NS             | 0.0669    | 0.377   | NS             | -0.1076   | 0.248   | NS             | 0.296     | 0.335   | NS             |
| <b>Ludhiana</b>        |           | 0.001   | L-L            |           | 0.001   | L-L            | -0.0974   | 0.04    | L-H            |           | 0.001   | L-L            | 0.1432    | 0.245   | NS             | 0.0295    | 0.47    | NS             | -0.0684   | 0.336   | NS             | -0.169    | 0.108   | NS             |
| <b>Mansa</b>           |           | 0.001   | L-L            |           | 0.001   | L-L            | 0.0455    | 0.14    | NS             |           | 0.001   | L-L            | -0.2099   | 0.208   | NS             | -0.024    | 0.251   | NS             | 0.0936    | 0.486   | NS             | 0.1612    | 0.001   | L-L            |
| <b>Moga</b>            |           | 0.001   | L-L            |           | 0.001   | L-L            | 0.0455    | 0.287   | NS             |           | 0.001   | L-L            | -0.18     | 0.117   | NS             | 0.0688    | 0.274   | NS             | -0.2215   | 0.105   | NS             | -0.1062   | 0.258   | NS             |
| <b>Muktsar</b>         |           | 0.001   | L-L            |           | 0.001   | L-L            | 0.0455    | 0.195   | NS             |           | 0.001   | L-L            | -0.3666   | 0.125   | NS             | 0.0675    | 0.457   | NS             | -0.4326   | 0.038   | L-H            | 0.1612    | 0.001   | L-L            |
| <b>Pathankot</b>       |           | 0.001   | L-L            |           | 0.001   | L-L            | 0.0455    | 0.095   | NS             |           | 0.001   | L-L            | 0.0547    | 0.414   | NS             | 0.0586    | 0.212   | NS             | 0.2008    | 0.438   | NS             | -0.21     | 0.29    | NS             |
| <b>Patiala</b>         |           | 0.001   | L-L            |           | 0.001   | L-L            | 0.0455    | 0.14    | NS             |           | 0.001   | L-L            | -0.5558   | 0.422   | NS             | 0.3876    | 0.15    | NS             | 0.2008    | 0.402   | NS             | 0.1612    | 0.001   | L-L            |
| <b>Rupnagar</b>        |           | 0.001   | L-L            |           | 0.001   | L-L            | -0.9545   | 0.001   | H-L            |           | 0.001   | L-L            | 0.0809    | 0.345   | NS             | 0.0651    | 0.474   | NS             | 0.1066    | 0.396   | NS             | -0.5463   | 0.421   | NS             |
| <b>SAS Nagar</b>       |           | 0.001   | L-L            |           | 0.001   | L-L            | -0.2879   | 0.001   | L-H            |           | 0.001   | L-L            | 0.1428    | 0.109   | NS             | -0.3437   | 0.138   | NS             | 0.0511    | 0.427   | NS             | -0.0747   | 0.283   | NS             |
| <b>Sangrur</b>         |           | 0.001   | L-L            |           | 0.001   | L-L            | 0.0455    | 0.222   | NS             |           | 0.001   | L-L            | -0.0332   | 0.345   | NS             | 0.5291    | 0.231   | NS             | 0.2008    | 0.221   | NS             | 0.1612    | 0.314   | NS             |
| <b>Nawanshahr</b>      |           | 0.001   | L-L            |           | 0.001   | L-L            | -0.1545   | 0.222   | NS             |           | 0.001   | L-L            | 0.0282    | 0.492   | NS             | 0.0571    | 0.488   | NS             | -0.6824   | 0.474   | NS             | -0.4738   | 0.001   | L-H            |
| <b>Tarn Taran</b>      |           | 0.001   | L-L            |           | 0.001   | L-L            | 0.0455    | 0.138   | NS             |           | 0.001   | L-L            | -0.0016   | 0.399   | NS             | 0.0729    | 0.327   | NS             | -0.0403   | 0.315   | NS             | -0.1266   | 0.173   | NS             |

\*NS: Non-significant; L-L: Low-Low; L-H: low-High; H-L: High Low; H-H: High-High

**Supplementary material 4c: District-wise trends of Local Moran's I value to depict the stability of the hotspots for the Malaria (*P. Falciparum*) cases reported under IDSP in Punjab between 2012-19**

| District        | 2012      |         |                | 2013      |         |                | 2014      |         |                | 2015      |         |                | 2016      |         |                | 2017      |         |                | 2018      |         |                | 2019      |         |                |
|-----------------|-----------|---------|----------------|-----------|---------|----------------|-----------|---------|----------------|-----------|---------|----------------|-----------|---------|----------------|-----------|---------|----------------|-----------|---------|----------------|-----------|---------|----------------|
|                 | Moran's I | p_value | Classification | Moran's I | p_value | Classification | Moran's I | p_value | Classification | Moran's I | p_value | Classification | Moran's I | p_value | Classification | Moran's I | p_value | Classification | Moran's I | p_value | Classification | Moran's I | p_value | Classification |
| Amritsar        | 0.0569    | 0.201   | NS             | 0.0461    | 0.134   | NS             | 0.0638    | 0.419   | NS             | 0.0647    | 0.25    | NS             |           | 0.001   | L-L            | 0.1315    | 0.358   | NS             | 0.1361    | 0.389   | NS             | 0.0495    | 0.39    | NS             |
| Barnala         | -0.1761   | 0.137   | NS             | -0.163    | 0.024   | L-H            | 0.0486    | 0.464   | NS             | 0.0647    | 0.406   | NS             |           | 0.001   | L-L            | 0.0846    | 0.413   | NS             | 0.1361    | 0.408   | NS             | 0.0381    | 0.317   | NS             |
| Bathinda        | 0.0413    | 0.367   | NS             | 0.0442    | 0.404   | NS             | -0.1731   | 0.099   | NS             | 0.0647    | 0.406   | NS             |           | 0.001   | L-L            | -0.0652   | 0.451   | NS             | 0.1361    | 0.408   | NS             | 0.0381    | 0.317   | NS             |
| Faridkot        | 0.0268    | 0.331   | NS             | 0.0422    | 0.422   | NS             | -1.1207   | 0.001   | H-L            | 0.0647    | 0.326   | NS             |           | 0.001   | L-L            | 0.0128    | 0.347   | NS             | 0.1361    | 0.493   | NS             | 0.0638    | 0.407   | NS             |
| Fatehgarh Sahib | -0.1887   | 0.002   | L-H            | -0.162    | 0.061   | NS             | 0.0486    | 0.448   | NS             | -0.22     | 0.001   | L-H            |           | 0.001   | L-L            | -0.4322   | 0.417   | NS             | 1.6863    | 0.054   | NS             | 0.0638    | 0.299   | NS             |
| Fazilka         | 0.0597    | 0.324   | NS             | 0.0475    | 0.499   | NS             | 0.0638    | 0.284   | NS             | 0.0647    | 0.175   | NS             |           | 0.001   | L-L            | -0.1264   | 0.107   | NS             | 0.1361    | 0.292   | NS             | 0.0638    | 0.343   | NS             |
| Ferozepur       | 0.0552    | 0.129   | NS             | 0.0478    | 0.22    | NS             | -0.1054   | 0.317   | NS             | 0.0647    | 0.445   | NS             |           | 0.001   | L-L            | -0.14     | 0.141   | NS             | 0.1361    | 0.257   | NS             | 0.0574    | 0.284   | NS             |
| Gurdaspur       | 0.0477    | 0.325   | NS             | 0.0467    | 0.249   | NS             | 0.0638    | 0.485   | NS             | 0.0647    | 0.326   | NS             |           | 0.001   | L-L            | 0.1315    | 0.259   | NS             | 0.1361    | 0.498   | NS             | -0.0755   | 0.047   | L-H            |
| Hoshiarpur      | 0.0399    | 0.144   | NS             | 0.0458    | 0.225   | NS             | 0.04      | 0.338   | NS             | 0.0647    | 0.477   | NS             |           | 0.001   | L-L            | 0.1051    | 0.241   | NS             | 0.0169    | 0.487   | NS             | -0.8644   | 0.286   | NS             |
| Jalandhar       | 0.0545    | 0.196   | NS             | 0.045     | 0.405   | NS             | 0.0273    | 0.274   | NS             | 0.0647    | 0.477   | NS             |           | 0.001   | L-L            | 0.0821    | 0.158   | NS             | 0.1361    | 0.333   | NS             | -0.0391   | 0.148   | NS             |
| Kapurthala      | 0.056     | 0.088   | NS             | 0.0475    | 0.305   | NS             | 0.0434    | 0.424   | NS             | 0.0647    | 0.445   | NS             |           | 0.001   | L-L            | 0.1245    | 0.107   | NS             | 0.1361    | 0.257   | NS             | -0.1184   | 0.115   | NS             |
| Ludhiana        | -0.0824   | 0.282   | NS             | -0.0804   | 0.243   | NS             | -0.0084   | 0.428   | NS             | 0.0647    | 0.445   | NS             |           | 0.001   | L-L            | 0.0161    | 0.453   | NS             | -0.1689   | 0.101   | NS             | 0.0574    | 0.266   | NS             |
| Mansa           | -0.3289   | 0.062   | NS             | -0.272    | 0.069   | NS             | 0.0638    | 0.38    | NS             | 0.0647    | 0.25    | NS             |           | 0.001   | L-L            | 0.0534    | 0.39    | NS             | 0.1361    | 0.399   | NS             | -0.065    | 0.001   | H-L            |
| Moga            | 0.05      | 0.484   | NS             | 0.0461    | 0.351   | NS             | -0.1463   | 0.079   | NS             | 0.0647    | 0.477   | NS             |           | 0.001   | L-L            | 0.0842    | 0.394   | NS             | 0.1361    | 0.333   | NS             | 0.0563    | 0.449   | NS             |
| Muktsar         | 0.0485    | 0.398   | NS             | 0.0436    | 0.487   | NS             | -0.2323   | 0.067   | NS             | 0.0647    | 0.326   | NS             |           | 0.001   | L-L            | 0.2733    | 0.035   | H-H            | 0.1361    | 0.498   | NS             | 0.0638    | 0.405   | NS             |
| Pathankot       | 0.0467    | 0.375   | NS             | 0.0476    | 0.442   | NS             | 0.0638    | 0.271   | NS             | 0.0647    | 0.175   | NS             |           | 0.001   | L-L            | 0.1315    | 0.491   | NS             | 0.1361    | 0.292   | NS             | -0.5514   | 0.009   | L-H            |
| Patiala         | -0.1825   | 0.02    | L-H            | -0.2996   | 0.093   | NS             | 0.0638    | 0.38    | NS             | 0.2862    | 0.052   | NS             |           | 0.001   | L-L            | -0.085    | 0.19    | NS             | -0.6236   | 0.001   | L-H            | 0.0638    | 0.486   | NS             |
| Rupnagar        | 0.0383    | 0.311   | NS             | 0.0454    | 0.274   | NS             | 0.02      | 0.229   | NS             | 0.0159    | 0.224   | NS             |           | 0.001   | L-L            | 0.0003    | 0.38    | NS             | 1.3602    | 0.051   | NS             | -0.1736   | 0.132   | NS             |
| SAS Nagar       | 0.0159    | 0.256   | NS             | 0.0473    | 0.001   | L-L            | 0.0638    | 0.38    | NS             | 0.91      | 0.129   | NS             |           | 0.001   | L-L            | -0.1214   | 0.162   | NS             | 3.0586    | 0.001   | H-H            | 0.0638    | 0.486   | NS             |
| Sangrur         | -0.9429   | 0.396   | NS             | -0.9367   | 0.196   | NS             | 0.0486    | 0.448   | NS             | -0.1712   | 0.037   | L-H            |           | 0.001   | L-L            | 0.0016    | 0.388   | NS             | -0.1479   | 0.291   | NS             | 0.0381    | 0.322   | NS             |
| Nawanshahr      | 0.0515    | 0.407   | NS             | 0.0413    | 0.387   | NS             | -0.0601   | 0.401   | NS             | 0.0647    | 0.421   | NS             |           | 0.001   | L-L            | 0.0998    | 0.311   | NS             | -0.0069   | 0.491   | NS             | -0.1827   | 0.069   | NS             |
| Tarn Taran      | 0.0597    | 0.163   | NS             | 0.0485    | 0.233   | NS             | 0.0638    | 0.368   | NS             | 0.0647    | 0.255   | NS             |           | 0.001   | L-L            | 0.1315    | 0.334   | NS             | 0.1361    | 0.401   | NS             | 0.0638    | 0.486   | NS             |

\*NS: Non-significant; L-L: Low-Low; L-H: low-High; H-L: High Low; H-H: High-High

**Supplementary material 4d: District-wise trends of Local Moran's I value to depict the stability of the hotspots for the Malaria (*P. Vivax*) cases reported under IDSP in Punjab between 2012-19**

| District               | 2012      |         |                | 2013      |         |                | 2014      |         |                | 2015      |         |                | 2016      |         |                | 2017      |         |                | 2018      |         |                | 2019      |         |                     |
|------------------------|-----------|---------|----------------|-----------|---------|----------------|-----------|---------|----------------|-----------|---------|----------------|-----------|---------|----------------|-----------|---------|----------------|-----------|---------|----------------|-----------|---------|---------------------|
|                        | Moran's I | p_value | Classification | Moran's I | p_value | Classification | Moran's I | p_value | Classification | Moran's I | p_value | Classification | Moran's I | p_value | Classification | Moran's I | p_value | Classification | Moran's I | p_value | Classification | Moran's I | p_value | 2019 Classification |
| <b>Amritsar</b>        | 0.3747    | 0.085   | NS             | 0.2752    | 0.111   | NS             | 0.1709    | 0.111   | NS             | 0.1827    | 0.204   | NS             | 0.3114    | 0.076   | NS             | 0.2592    | 0.087   | NS             | 0.1634    | 0.173   | NS             | 0.2767    | 0.087   | NS                  |
| <b>Barnala</b>         | -0.342    | 0.126   | NS             | -0.4121   | 0.033   | L-H            | -0.0711   | 0.023   | L-H            | -0.1642   | 0.068   | NS             | -0.2876   | 0.023   | L-H            | -0.1957   | 0.057   | NS             | -0.4379   | 0.071   | NS             | -0.4864   | 0.037   | L-H                 |
| <b>Bathinda</b>        | -0.4936   | 0.002   | L-H            | 0.4448    | 0.001   | H-H            | 2.2373    | 0.001   | H-H            | 0.7067    | 0.024   | H-H            | 1.0893    | 0.029   | H-H            | 0.585     | 0.093   | NS             | 0.5971    | 0.028   | H-H            | 1.2219    | 0.062   | NS                  |
| <b>Faridkot</b>        | 1.4894    | 0.039   | H-H            | 0.697     | 0.171   | NS             | 0.9415    | 0.068   | NS             | 0.1794    | 0.24    | NS             | 0.1418    | 0.301   | NS             | 0.0084    | 0.307   | NS             | 0.0383    | 0.252   | NS             | 0.1964    | 0.245   | NS                  |
| <b>Fatehgarh Sahib</b> | 0.0758    | 0.413   | NS             | 0.1068    | 0.36    | NS             | 0.2257    | 0.263   | NS             | -0.0781   | 0.387   | NS             | -0.0708   | 0.368   | NS             | 0.0327    | 0.451   | NS             | -0.0047   | 0.381   | NS             | 0.1298    | 0.346   | NS                  |
| <b>Fazilka</b>         | -0.6304   | 0.144   | NS             | -0.438    | 0.138   | NS             | -0.3406   | 0.266   | NS             | -0.0418   | 0.391   | NS             | 0.0636    | 0.464   | NS             | -0.0478   | 0.399   | NS             | -0.0057   | 0.357   | NS             | -0.0071   | 0.444   | NS                  |
| <b>Ferozepur</b>       | 0.1397    | 0.081   | NS             | -0.029    | 0.319   | NS             | -0.0335   | 0.41    | NS             | -0.0483   | 0.359   | NS             | 0.0432    | 0.37    | NS             | 0.0111    | 0.278   | NS             | 0.0446    | 0.428   | NS             | 0.0496    | 0.302   | NS                  |
| <b>Gurdaspur</b>       | 0.4279    | 0.029   | L-L            | 0.3355    | 0.019   | L-L            | 0.3482    | 0.075   | NS             | 0.4235    | 0.032   | L-L            | 0.3635    | 0.058   | NS             | 0.1981    | 0.25    | NS             | 0.3048    | 0.036   | L-L            | 0.1142    | 0.337   | NS                  |
| <b>Hoshiarpur</b>      | 0.3367    | 0.004   | L-L            | 0.2873    | 0.004   | L-L            | 0.2884    | 0.002   | L-L            | 0.2959    | 0.001   | L-L            | 0.0425    | 0.001   | L-L            | -0.3581   | 0.001   | H-L            | 0.2415    | 0.01    | L-L            | -0.2965   | 0.023   | H-L                 |
| <b>Jalandhar</b>       | 0.0545    | 0.33    | NS             | 0.1434    | 0.231   | NS             | 0.2044    | 0.197   | NS             | 0.1787    | 0.133   | NS             | 0.1798    | 0.124   | NS             | 0.1691    | 0.196   | NS             | 0.1764    | 0.055   | NS             | 0.1678    | 0.187   | NS                  |
| <b>Kapurthala</b>      | 0.2674    | 0.072   | NS             | 0.2681    | 0.02    | L-L            | 0.3357    | 0.038   | L-L            | 0.2407    | 0.101   | NS             | 0.3384    | 0.058   | NS             | 0.1876    | 0.11    | NS             | 0.2322    | 0.065   | NS             | 0.189     | 0.116   | NS                  |
| <b>Ludhiana</b>        | 0.071     | 0.232   | NS             | 0.0034    | 0.115   | NS             | 0.0364    | 0.159   | NS             | 0.0294    | 0.022   | L-L            | -0.0076   | 0.037   | H-L            | 0.1639    | 0.008   | L-L            | 0.1139    | 0.018   | L-L            | 0.2241    | 0.007   | L-L                 |
| <b>Mansa</b>           | -0.4292   | 0.438   | NS             | -0.2804   | 0.332   | NS             | 1.6818    | 0.052   | NS             | 0.5414    | 0.182   | NS             | 1.3573    | 0.055   | NS             | 0.6592    | 0.117   | NS             | -0.1817   | 0.273   | NS             | 1.4381    | 0.098   | NS                  |
| <b>Moga</b>            | 0.178     | 0.183   | NS             | 0.0126    | 0.372   | NS             | 0.0783    | 0.172   | NS             | -0.1511   | 0.223   | NS             | -0.1733   | 0.19    | NS             | 0.0029    | 0.443   | NS             | -0.0024   | 0.412   | NS             | -0.089    | 0.363   | NS                  |
| <b>Muktsar</b>         | 0.7755    | 0.09    | NS             | 0.4134    | 0.228   | NS             | 0.6971    | 0.114   | NS             | -0.0885   | 0.156   | NS             | -0.2188   | 0.093   | NS             | -0.0805   | 0.216   | NS             | 0.0785    | 0.224   | NS             | 0.0839    | 0.108   | NS                  |
| <b>Pathankot</b>       | 0.4304    | 0.136   | NS             | 0.334     | 0.143   | NS             | 0.3814    | 0.185   | NS             | 0.4615    | 0.126   | NS             | 0.2888    | 0.367   | NS             | 0.0306    | 0.413   | NS             | 0.2844    | 0.09    | NS             | -0.0374   | 0.288   | NS                  |
| <b>Patiala</b>         | 0.0063    | 0.446   | NS             | 0.0463    | 0.462   | NS             | 0.1634    | 0.355   | NS             | -0.1939   | 0.469   | NS             | -0.0146   | 0.337   | NS             | -0.0111   | 0.338   | NS             | 0.0007    | 0.336   | NS             | 0.05      | 0.436   | NS                  |
| <b>Rupnagar</b>        | 0.2654    | 0.125   | NS             | 0.2079    | 0.199   | NS             | 0.2753    | 0.173   | NS             | 0.2233    | 0.216   | NS             | 0.0515    | 0.449   | NS             | 0.0107    | 0.415   | NS             | 0.084     | 0.433   | NS             | 0.0449    | 0.467   | NS                  |
| <b>SAS Nagar</b>       | -0.0844   | 0.205   | NS             | 0.0141    | 0.156   | NS             | 0.0955    | 0.058   | NS             | -0.0554   | 0.47    | NS             | -0.6187   | 0.121   | NS             | -0.4839   | 0.167   | NS             | -0.2138   | 0.418   | NS             | -0.2882   | 0.137   | NS                  |
| <b>Sangrur</b>         | 0.0412    | 0.362   | NS             | -0.0324   | 0.164   | NS             | -0.065    | 0.207   | NS             | -0.1374   | 0.068   | NS             | 0.0371    | 0.139   | NS             | -0.0837   | 0.2     | NS             | -0.1673   | 0.166   | NS             | -0.0593   | 0.271   | NS                  |
| <b>Nawanshahr</b>      | 0.3313    | 0.075   | NS             | 0.261     | 0.081   | NS             | 0.2926    | 0.08    | NS             | 0.3521    | 0.058   | NS             | 0.2744    | 0.145   | NS             | 0.204     | 0.206   | NS             | 0.1491    | 0.053   | NS             | 0.1706    | 0.252   | NS                  |
| <b>Tarn Taran</b>      | 0.1501    | 0.337   | NS             | 0.1436    | 0.168   | NS             | 0.1601    | 0.217   | NS             | -0.0203   | 0.411   | NS             | 0.1635    | 0.12    | NS             | 0.1029    | 0.217   | NS             | 0.0544    | 0.202   | NS             | 0.2622    | 0.206   | NS                  |

*\*NS: Non-significant; L-L: Low-Low; L-H: low-High; H-L: High Low; H-H: High-High*

**Supplementary material 4e: District-wise trends of Local Moran's I value to depict the stability of the hotspots for the Enteric Fever cases reported under IDSP in Punjab between 2012-19**

| District        | 2012      |         |                | 2013      |         |                | 2014      |         |                | 2015      |         |                | 2016      |         |                | 2017      |         |                | 2018      |         |                | 2019      |         |                |
|-----------------|-----------|---------|----------------|-----------|---------|----------------|-----------|---------|----------------|-----------|---------|----------------|-----------|---------|----------------|-----------|---------|----------------|-----------|---------|----------------|-----------|---------|----------------|
|                 | Moran's I | p_value | Classification | Moran's I | p_value | Classification | Moran's I | p_value | Classification | Moran's I | p_value | Classification | Moran's I | p_value | Classification | Moran's I | p_value | Classification | Moran's I | p_value | Classification | Moran's I | p_value | Classification |
| Amritsar        | -0.0611   | 0.349   | NS             | -0.0347   | 0.338   | NS             | -0.0456   | 0.256   | NS             | 0.0308    | 0.496   | NS             | -0.0299   | 0.471   | NS             | 0.0042    | 0.466   | NS             | -0.0005   | 0.477   | NS             | -0.2654   | 0.328   | NS             |
| Barnala         | -0.3078   | 0.183   | NS             | -0.3834   | 0.145   | NS             | -0.1485   | 0.381   | NS             | -0.1663   | 0.381   | NS             | -0.0191   | 0.467   | NS             | 0.1899    | 0.313   | NS             | -0.0058   | 0.482   | NS             | -0.4974   | 0.241   | NS             |
| Bathinda        | 0.0602    | 0.118   | NS             | 0.0006    | 0.12    | NS             | -0.0504   | 0.132   | NS             | -0.4304   | 0.048   | H-L            | 0.239     | 0.152   | NS             | 0.5044    | 0.108   | NS             | 0.2225    | 0.269   | NS             | 0.2977    | 0.225   | NS             |
| Faridkot        | -0.1559   | 0.304   | NS             | 0.0287    | 0.463   | NS             | -0.1851   | 0.353   | NS             | -0.1595   | 0.363   | NS             | 0.0501    | 0.348   | NS             | 0.3209    | 0.153   | NS             | 0.2074    | 0.186   | NS             | -0.0333   | 0.495   | NS             |
| Fatehgarh Sahib | -0.2379   | 0.23    | NS             | -0.1049   | 0.231   | NS             | -0.0003   | 0.471   | NS             | -0.0162   | 0.491   | NS             | -0.0045   | 0.421   | NS             | -0.0236   | 0.398   | NS             | -0.0869   | 0.298   | NS             | -0.0258   | 0.19    | NS             |
| Fazilka         | -0.7206   | 0.197   | NS             | 0.1447    | 0.47    | NS             | -0.2127   | 0.364   | NS             | -0.0244   | 0.455   | NS             | 0.1457    | 0.307   | NS             | -0.1528   | 0.349   | NS             | 0.0398    | 0.404   | NS             | 0.4038    | 0.122   | NS             |
| Ferozepur       | -0.1272   | 0.438   | NS             | 0.0263    | 0.374   | NS             | 0.157     | 0.246   | NS             | 0.1879    | 0.178   | NS             | 0.3802    | 0.049   | H-H            | -0.0931   | 0.07    | NS             | -0.5949   | 0.036   | L-H            | 0.3242    | 0.036   | H-H            |
| Gurdaspur       | -0.0631   | 0.437   | NS             | -0.0038   | 0.437   | NS             | 0.0313    | 0.388   | NS             | 0.0201    | 0.462   | NS             | -0.0753   | 0.417   | NS             | -0.0094   | 0.46    | NS             | 0.0198    | 0.494   | NS             | 0.0632    | 0.417   | NS             |
| Hoshiarpur      | -0.0074   | 0.36    | NS             | 0.0743    | 0.166   | NS             | -0.025    | 0.089   | NS             | -0.1885   | 0.185   | NS             | -0.1299   | 0.139   | NS             | -0.0319   | 0.389   | NS             | -0.088    | 0.346   | NS             | -0.1937   | 0.31    | NS             |
| Jalandhar       | 0.5394    | 0.131   | NS             | 0.5131    | 0.183   | NS             | 1.0773    | 0.03    | H-H            | 0.6072    | 0.099   | NS             | 0.5592    | 0.12    | NS             | -0.1228   | 0.476   | NS             | -0.3019   | 0.381   | NS             | 0.4791    | 0.147   | NS             |
| Kapurthala      | 0.3163    | 0.097   | NS             | 0.2686    | 0.146   | NS             | 0.6523    | 0.062   | NS             | 0.2255    | 0.247   | NS             | 0.0844    | 0.313   | NS             | -0.115    | 0.455   | NS             | -0.3651   | 0.243   | NS             | -0.4154   | 0.316   | NS             |
| Ludhiana        | -0.0541   | 0.222   | NS             | -0.104    | 0.067   | NS             | -0.178    | 0.173   | NS             | -0.0806   | 0.246   | NS             | -0.0542   | 0.34    | NS             | 0.0217    | 0.42    | NS             | 0.0022    | 0.442   | NS             | 0.0677    | 0.361   | NS             |
| Mansa           | -0.2235   | 0.15    | NS             | -0.213    | 0.17    | NS             | -0.0217   | 0.406   | NS             | -0.0203   | 0.414   | NS             | -0.1448   | 0.381   | NS             | -0.0229   | 0.319   | NS             | -0.0952   | 0.357   | NS             | -0.1235   | 0.305   | NS             |
| Moga            | -0.0399   | 0.2     | NS             | 0.0239    | 0.278   | NS             | 0.0827    | 0.259   | NS             | 0.024     | 0.194   | NS             | -0.0788   | 0.318   | NS             | 0.1865    | 0.174   | NS             | 0.2833    | 0.119   | NS             | 0.0065    | 0.455   | NS             |
| Muktsar         | -0.0385   | 0.453   | NS             | 0.1851    | 0.22    | NS             | 0.1337    | 0.308   | NS             | -0.1593   | 0.31    | NS             | -0.1107   | 0.288   | NS             | 0.0184    | 0.292   | NS             | 0.0819    | 0.371   | NS             | -0.2154   | 0.355   | NS             |
| Pathankot       | -0.2099   | 0.324   | NS             | -0.1836   | 0.259   | NS             | -0.1637   | 0.406   | NS             | 0.2781    | 0.289   | NS             | 0.1688    | 0.253   | NS             | 0.0567    | 0.408   | NS             | 0.1519    | 0.217   | NS             | 0.1919    | 0.099   | NS             |
| Patiala         | 0.1645    | 0.189   | NS             | 0.1551    | 0.157   | NS             | 0.131     | 0.325   | NS             | 0.1769    | 0.271   | NS             | 0.0138    | 0.261   | NS             | 0.0721    | 0.351   | NS             | 0.07      | 0.361   | NS             | 0.111     | 0.292   | NS             |
| Rupnagar        | 0.2574    | 0.157   | NS             | 0.1259    | 0.327   | NS             | 0.2063    | 0.233   | NS             | 0.1783    | 0.317   | NS             | 0.2233    | 0.29    | NS             | 0.3176    | 0.195   | NS             | 0.1851    | 0.145   | NS             | 0.1416    | 0.215   | NS             |
| SAS Nagar       | 0.1834    | 0.277   | NS             | 0.1208    | 0.411   | NS             | -0.0177   | 0.466   | NS             | -0.0021   | 0.441   | NS             | 0.0342    | 0.317   | NS             | -0.0296   | 0.426   | NS             | 0.0342    | 0.447   | NS             | 0.0337    | 0.461   | NS             |
| Sangrur         | -0.9617   | 0.275   | NS             | -0.7856   | 0.36    | NS             | -0.1892   | 0.42    | NS             | -0.0774   | 0.446   | NS             | -0.2173   | 0.414   | NS             | -0.0446   | 0.464   | NS             | -0.1695   | 0.479   | NS             | 0.093     | 0.342   | NS             |
| Nawanshahr      | -0.1306   | 0.238   | NS             | -0.1404   | 0.064   | NS             | -0.0547   | 0.076   | NS             | -0.0669   | 0.127   | NS             | -0.1719   | 0.069   | NS             | -0.0445   | 0.318   | NS             | -0.0819   | 0.25    | NS             | -0.5018   | 0.061   | NS             |
| Tarn Taran      | -0.5193   | 0.07    | NS             | -0.2586   | 0.269   | NS             | -0.897    | 0.1     | NS             | -0.6831   | 0.189   | NS             | -0.671    | 0.153   | NS             | -0.0646   | 0.415   | NS             | 0.0455    | 0.444   | NS             | -0.1268   | 0.186   | NS             |

**Supplementary material 4f: District-wise trends of Local Moran's I value to depict the stability of the hotspots for the Malaria (*P. Vivax*) cases reported under IDSP in Punjab between 2012-19**

| District               | 2012      |         |                | 2013      |         |                | 2014      |         |                | 2015      |         |                | 2016      |         |                | 2017      |         |                | 2018      |         |                | 2019      |         |                |
|------------------------|-----------|---------|----------------|-----------|---------|----------------|-----------|---------|----------------|-----------|---------|----------------|-----------|---------|----------------|-----------|---------|----------------|-----------|---------|----------------|-----------|---------|----------------|
|                        | Moran's I | p value | Classification | Moran's I | p value | Classification | Moran's I | p value | Classification | Moran's I | p value | Classification | Moran's I | p value | Classification | Moran's I | p value | Classification | Moran's I | p value | Classification | Moran's I | p value | Classification |
| <b>Amritsar</b>        | -0.1644   | 0.247   | NS             | -0.5694   | 0.16    | NS             | -0.356    | 0.179   | NS             | -0.5323   | 0.143   | NS             | -0.4409   | 0.302   | NS             | -0.2015   | 0.353   | NS             | -0.0615   | 0.384   | NS             | -0.3494   | 0.283   | NS             |
| <b>Barnala</b>         | 0.0189    | 0.367   | NS             | -0.0009   | 0.464   | NS             | -0.0585   | 0.39    | NS             | -0.0461   | 0.461   | NS             | 0.0044    | 0.269   | NS             | -0.0168   | 0.353   | NS             | -0.0808   | 0.15    | NS             | -0.0502   | 0.171   | NS             |
| <b>Bathinda</b>        | 0.3199    | 0.138   | NS             | 0.2783    | 0.156   | NS             | 0.3907    | 0.143   | NS             | 0.3676    | 0.199   | NS             | 0.5432    | 0.076   | NS             | 0.2328    | 0.214   | NS             | -0.0271   | 0.184   | NS             | 0.0155    | 0.206   | NS             |
| <b>Faridkot</b>        | -0.12     | 0.355   | NS             | 0.1011    | 0.323   | NS             | 0.1326    | 0.287   | NS             | 0.4257    | 0.108   | NS             | 0.4544    | 0.058   | NS             | 0.3134    | 0.165   | NS             | 0.0716    | 0.389   | NS             | 0.04      | 0.43    | NS             |
| <b>Fatehgarh Sahib</b> | -0.1755   | 0.239   | NS             | -0.2189   | 0.21    | NS             | 0.0117    | 0.159   | NS             | -0.0728   | 0.154   | NS             | 0.0066    | 0.455   | NS             | -0.0834   | 0.453   | NS             | -0.2132   | 0.223   | NS             | -0.0759   | 0.351   | NS             |
| <b>Fazilka</b>         | -1.6419   | 0.073   | NS             | -0.6972   | 0.318   | NS             | -0.5958   | 0.306   | NS             | 0.1707    | 0.335   | NS             | -0.5609   | 0.332   | NS             | -0.0349   | 0.43    | NS             | -0.0971   | 0.385   | NS             | -0.0372   | 0.322   | NS             |
| <b>Ferozepur</b>       | -0.6272   | 0.33    | NS             | -0.1467   | 0.426   | NS             | -0.2782   | 0.315   | NS             | 0.0067    | 0.448   | NS             | 0.1223    | 0.21    | NS             | -0.0303   | 0.182   | NS             | 0.0055    | 0.285   | NS             | 0.1348    | 0.094   | NS             |
| <b>Gurdaspur</b>       | -0.0759   | 0.485   | NS             | -0.0952   | 0.395   | NS             | -0.0804   | 0.461   | NS             | 0.0366    | 0.338   | NS             | -0.0899   | 0.233   | NS             | -0.0378   | 0.292   | NS             | 0.0108    | 0.44    | NS             | -0.0236   | 0.446   | NS             |
| <b>Hoshiarpur</b>      | 0.0217    | 0.414   | NS             | 0.0073    | 0.461   | NS             | 0.0113    | 0.452   | NS             | -0.0063   | 0.454   | NS             | 0.1752    | 0.273   | NS             | 0.0642    | 0.335   | NS             | 0.0145    | 0.493   | NS             | -0.0556   | 0.35    | NS             |
| <b>Jalandhar</b>       | 0.6139    | 0.063   | NS             | 0.4676    | 0.122   | NS             | 0.3699    | 0.141   | NS             | 0.3619    | 0.137   | NS             | 0.4619    | 0.128   | NS             | 0.1426    | 0.316   | NS             | -0.0738   | 0.479   | NS             | 0.2381    | 0.24    | NS             |
| <b>Kapurthala</b>      | 0.4943    | 0.024   | H-H            | 0.512     | 0.035   | H-H            | 0.4655    | 0.069   | NS             | 0.1572    | 0.286   | NS             | 0.1994    | 0.272   | NS             | 0.0664    | 0.36    | NS             | -0.1728   | 0.382   | NS             | -0.3293   | 0.389   | NS             |
| <b>Ludhiana</b>        | 0.0023    | 0.496   | NS             | -0.0163   | 0.493   | NS             | -0.0638   | 0.301   | NS             | -0.0051   | 0.469   | NS             | 0.0306    | 0.38    | NS             | -0.0385   | 0.421   | NS             | -0.0122   | 0.273   | NS             | 0.0591    | 0.268   | NS             |
| <b>Mansa</b>           | -0.0042   | 0.429   | NS             | 0.0285    | 0.339   | NS             | -0.2669   | 0.205   | NS             | 0.0164    | 0.358   | NS             | -0.0157   | 0.472   | NS             | 0.0927    | 0.183   | NS             | -0.5879   | 0.067   | NS             | -0.4608   | 0.077   | NS             |
| <b>Moga</b>            | -0.1968   | 0.179   | NS             | -0.1423   | 0.352   | NS             | -0.1459   | 0.354   | NS             | 0.0133    | 0.458   | NS             | 0.0739    | 0.343   | NS             | 0.082     | 0.334   | NS             | -0.0379   | 0.428   | NS             | -0.1261   | 0.259   | NS             |
| <b>Muktsar</b>         | 0.0535    | 0.435   | NS             | 0.2269    | 0.173   | NS             | 0.2353    | 0.16    | NS             | 0.556     | 0.112   | NS             | -0.0405   | 0.475   | NS             | -0.0063   | 0.367   | NS             | -0.0432   | 0.295   | NS             | -0.1162   | 0.269   | NS             |
| <b>Pathankot</b>       | -1.1491   | 0.156   | NS             | -1.3142   | 0.17    | NS             | -1.1733   | 0.176   | NS             | -0.5787   | 0.236   | NS             | -0.0778   | 0.347   | NS             | -0.0203   | 0.392   | NS             | 0.1077    | 0.416   | NS             | 0.0943    | 0.295   | NS             |
| <b>Patiala</b>         | 0.2913    | 0.238   | NS             | 0.6325    | 0.177   | NS             | 1.023     | 0.044   | H-H            | 1.1892    | 0.078   | NS             | 0.013     | 0.154   | NS             | -0.8402   | 0.08    | NS             | -1.0868   | 0.064   | NS             | -1.0989   | 0.092   | NS             |
| <b>Rupnagar</b>        | 0.0373    | 0.453   | NS             | 0.0126    | 0.425   | NS             | -0.2516   | 0.353   | NS             | -0.1738   | 0.455   | NS             | -0.3237   | 0.362   | NS             | 0.0238    | 0.432   | NS             | 0.2315    | 0.302   | NS             | 0.2383    | 0.282   | NS             |
| <b>SAS Nagar</b>       | 0.0084    | 0.394   | NS             | -0.0334   | 0.44    | NS             | -0.0198   | 0.486   | NS             | 0.0296    | 0.432   | NS             | -0.8159   | 0.121   | NS             | -1.1411   | 0.001   | H-L            | -0.5351   | 0.004   | H-L            | -0.1585   | 0.006   | H-L            |
| <b>Sangrur</b>         | 0.0385    | 0.377   | NS             | 0.2011    | 0.313   | NS             | 0.2941    | 0.253   | NS             | 0.4938    | 0.125   | NS             | -0.167    | 0.403   | NS             | -1.1621   | 0.155   | NS             | -1.5969   | 0.117   | NS             | -1.2327   | 0.16    | NS             |
| <b>Nawanshahr</b>      | -0.178    | 0.175   | NS             | -0.1682   | 0.161   | NS             | -0.0086   | 0.258   | NS             | -0.232    | 0.185   | NS             | -0.0268   | 0.164   | NS             | -0.0461   | 0.267   | NS             | -0.006    | 0.439   | NS             | -0.2477   | 0.189   | NS             |
| <b>Tarn Taran</b>      | -0.4095   | 0.053   | NS             | 0.1299    | 0.174   | NS             | -0.1733   | 0.143   | NS             | -0.1858   | 0.209   | NS             | -0.2234   | 0.238   | NS             | -0.0816   | 0.362   | NS             | -0.0727   | 0.352   | NS             | -0.1517   | 0.25    | NS             |

\*NS: Non-significant; L-L: Low-Low; L-H: low-High; H-L: High Low; H-H: High-High
